# Supplementary material for: Repeated α-GalCer Administration Induces a Type 2 Cytokine-Biased iNKT Cell Response and Exacerbates Atopic Skin Inflammation in Vα14Tg NC/Nga Mice
Source: Biomedicines. 2021 Nov 4;9(11):1619. doi: 10.3390/biomedicines9111619 (PMC8615984; doi:10.3390/biomedicines9111619)
Supplement: Supplementary file 1 [file biomedicines-09-01619-s001.zip › biomedicines-1375500-supplementary.pdf]

**Supporting documents to:**

**Repeated  $\alpha$ -GalCer administration induces a type 2 cytokine-biased iNKT cell response and exacerbates atopic skin inflammation in  $V\alpha 14^{Tg}$  NC/Nga mice**

**This document includes:**

**-Supplementary figures 1-2**

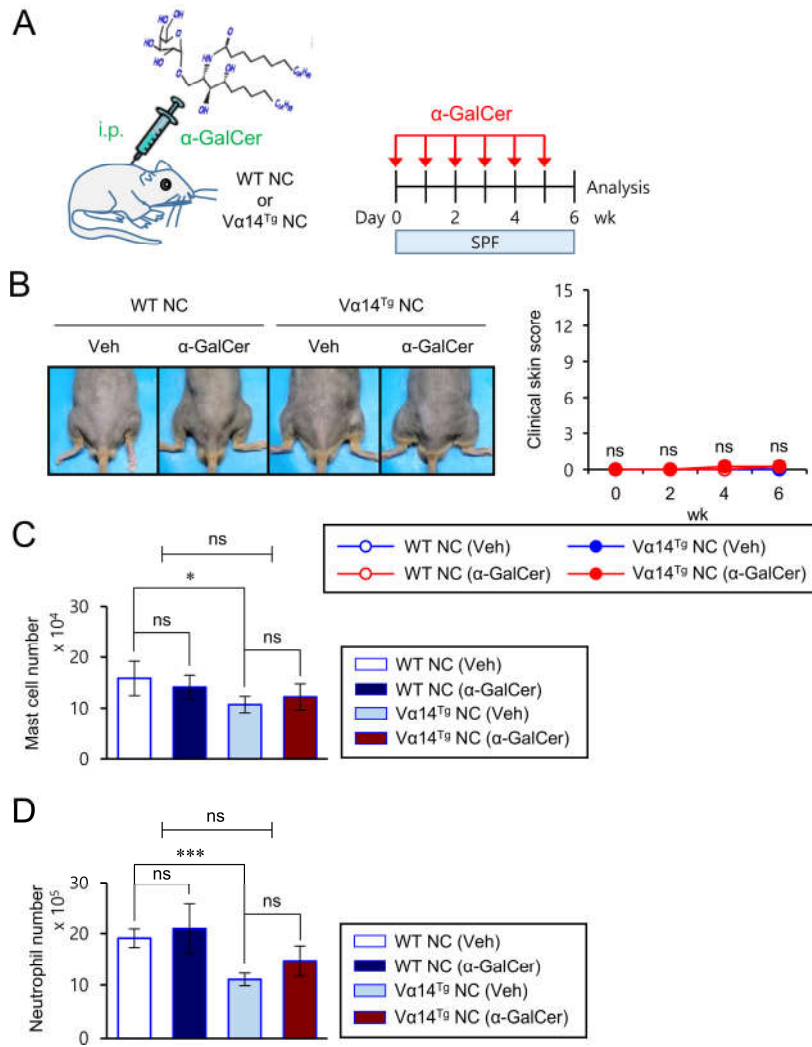

**Figure S1. Repeated  $\alpha$ -GalCer treatment fails to induce significant AD pathogenesis in  $V\alpha 14^{Tg}$  NC mice under SPF conditions.**

(A) Both WT NC and  $V\alpha 14^{Tg}$  NC mice were i.p. injected with either Veh ( $n = 4$ ) or  $\alpha$ -GalCer (2  $\mu$ g;  $n = 4$ ) once a week from 6 weeks of age for a total of 6 weeks under SPF conditions to spontaneously develop AD. (B) The clinical symptoms were measured once a week to monitor the onset of AD. (C-D) Spleens were prepared from mice, as shown in Fig. S1A. The absolute cell numbers of (C) mast cells ( $Fc\epsilon RI^+ c\text{-kit}^+ CD3^- CD19^-$ ) and (D) neutrophils ( $CD11b^+ Gr-1^+ CD3^- CD19^-$ ) were determined by flow cytometry. The mean values  $\pm$  SD ( $n = 4$  in A, B, C, and D; per group in the experiment; Student's  $t$ -test; \*  $P < 0.05$ , \*\*\*  $P < 0.001$ ) are shown. Two-way ANOVA ( $V\alpha 14$  TCR Tg  $\times$   $\alpha$ -GalCer) showed an interaction between these two factors.

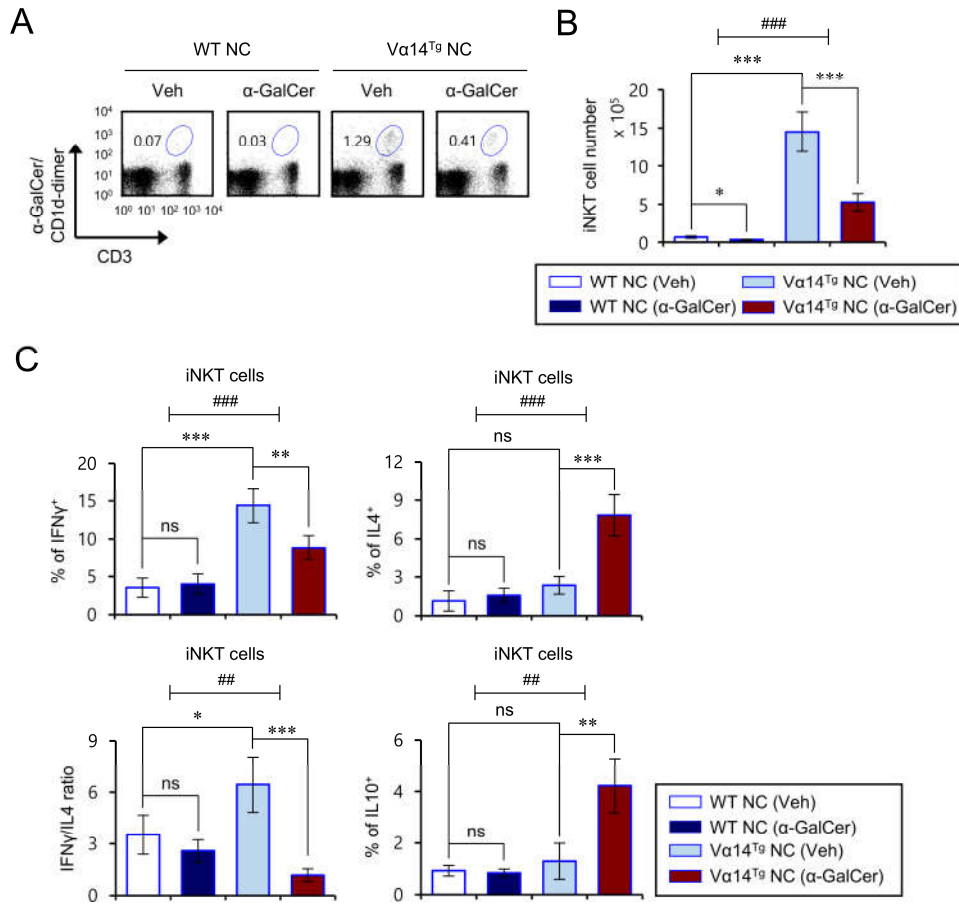

**Figure S2. Repeated  $\alpha$ -GalCer treatment polarizes  $V\alpha 14^{Tg}$  NC iNKT cells toward type 2 cytokine production under SPF conditions.**

(A-C) Spleens were prepared from mice as shown in Fig. S1. (A-B) The frequency and absolute cell number of splenic iNKT cells ( $\alpha$ -GalCer/CD1d-dimer<sup>+</sup>CD3<sup>+</sup>) were determined by flow cytometry. (C) The levels of intracellular IFN $\gamma$ , IL4, and IL10 were analyzed in splenic iNKT cells ( $\alpha$ -GalCer/CD1d-dimer<sup>+</sup>CD3<sup>+</sup>). The mean values  $\pm$  SD ( $n = 4$  in A, B, and C; per group in the experiment; Student's  $t$ -test; \*  $P < 0.05$ , \*\*  $P < 0.01$ , \*\*\*  $P < 0.001$ ) are shown. Two-way ANOVA ( $V\alpha 14$  TCR Tg  $\times$   $\alpha$ -GalCer) showed an interaction between these two factors (##  $P < 0.01$  and ###  $P < 0.001$ ).
